# Supplementary material for: Gold( i ) complexes of 2-(diphenylphosphino)aniline: synthesis and influence of the perhalophenyl ligand on their assembly
Source: Royal Society of Chemistry journal article supplement (doi:10.1039/d5dt01563d), 2025-01-01
Supplement: d5dt01563d1.pdf [file d5dt01563d1.pdf]

## Supporting Information

### **Gold(I) Complexes of 2-(diphenylphosphino)aniline: Synthesis and Influence of the Perhalophenyl Ligand on their Assembly**

Laura Coconubo-Guio, Sonia Moreno, Miguel Monge, Elena  
Olmos, José M. López-de-Luzuriaga

*<sup>a</sup>Departamento de Química, Universidad de La Rioja, Centro de  
Investigación en Síntesis Química (CISQ), Complejo Científico-  
Tecnológico, 26006 – Logroño, Spain.*

## I. Characterization of the complexes

### 1. IR spectra

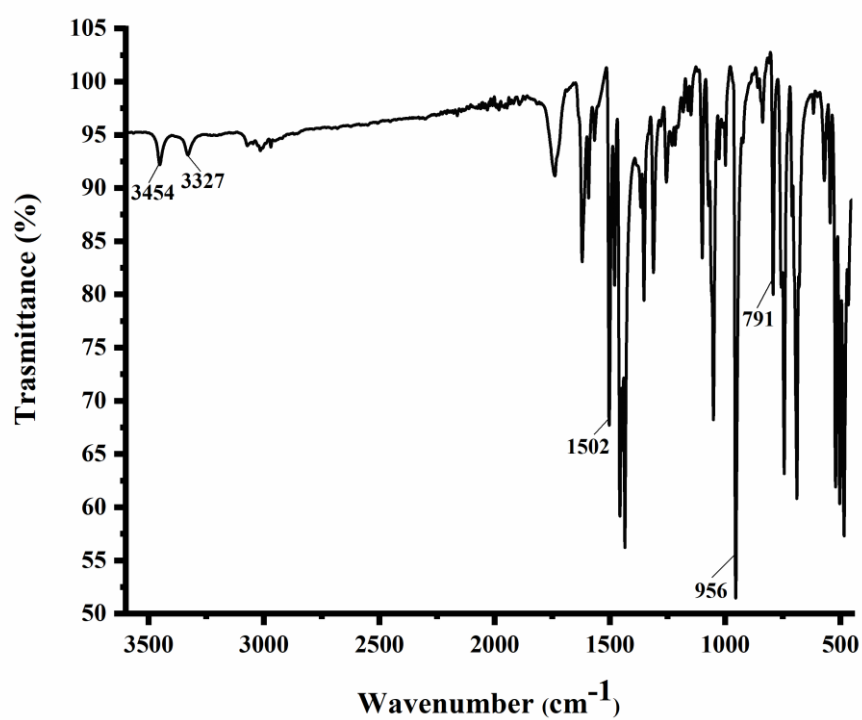

Figure S1. FT-IR spectrum of complex [Au(C<sub>6</sub>F<sub>5</sub>)(PNH<sub>2</sub>)] (1)

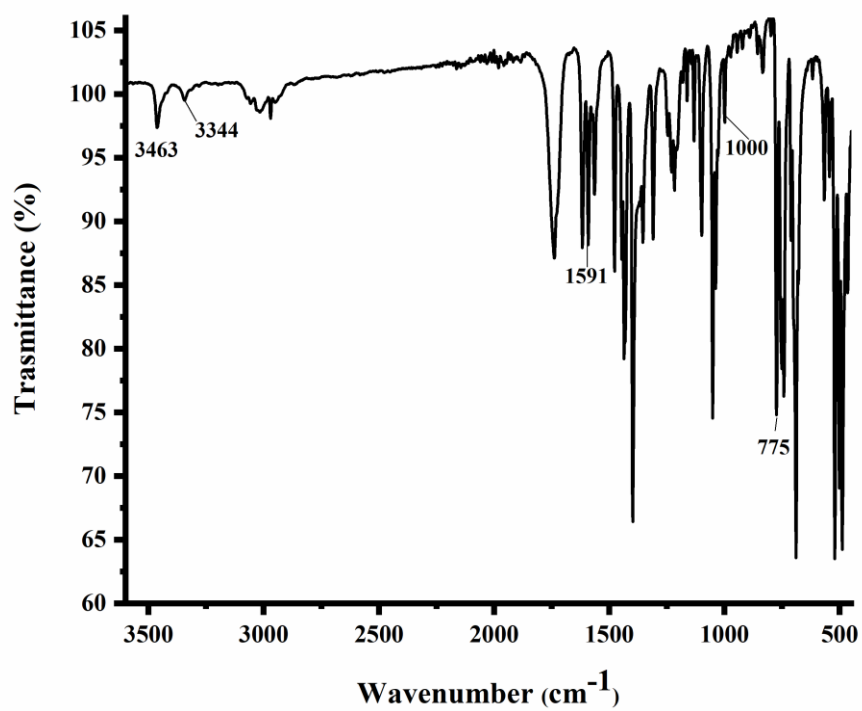

Figure S2. FT-IR spectrum of complex [Au(C<sub>6</sub>Cl<sub>2</sub>F<sub>3</sub>)(PNH<sub>2</sub>)] (2)

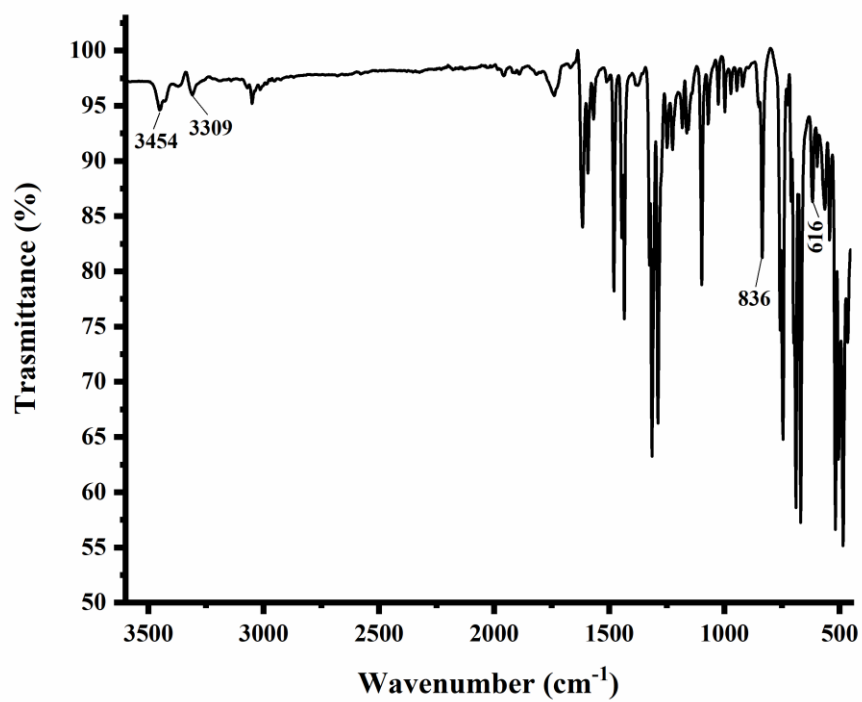

Figure S3. FT-IR spectrum of complex  $[\text{Au}(\text{C}_6\text{Cl}_5)(\text{PNH}_2)]$  (3)

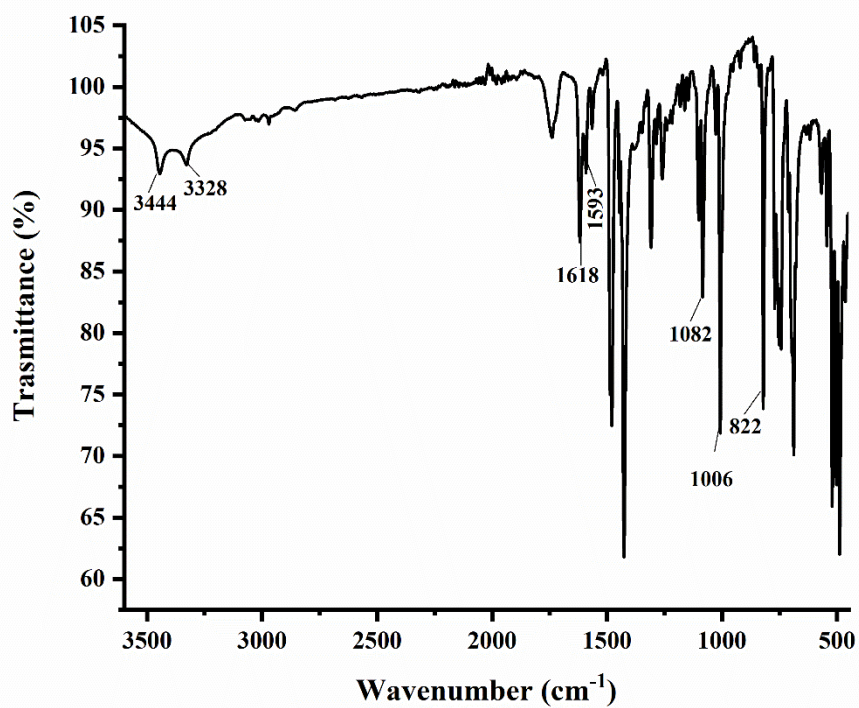

Figure S4. FT-IR spectrum of complex  $[\text{Au}(o\text{-C}_6\text{BrF}_4)(\text{PNH}_2)]$  (4)

## 2. Mass spectrometry data

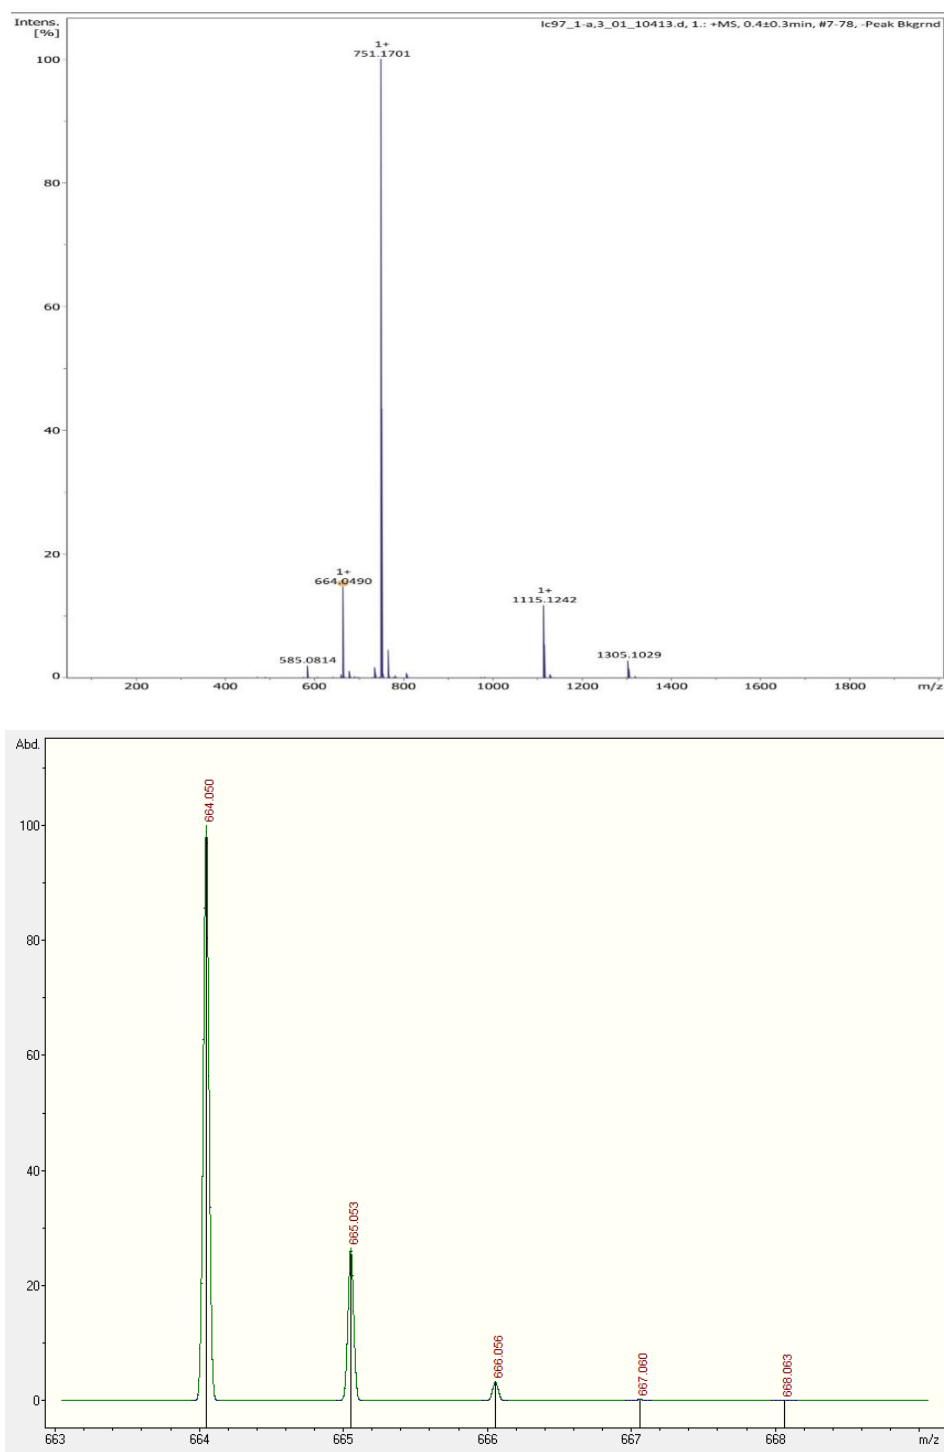

**Figure S5.** ESI positive of  $[\text{Au}(\text{C}_6\text{F}_5)(\text{PNH}_2)]$  (1): spectrum of experimental microTOF-Q (top) *versus* theoretical (bottom) positive mass spectrometry data

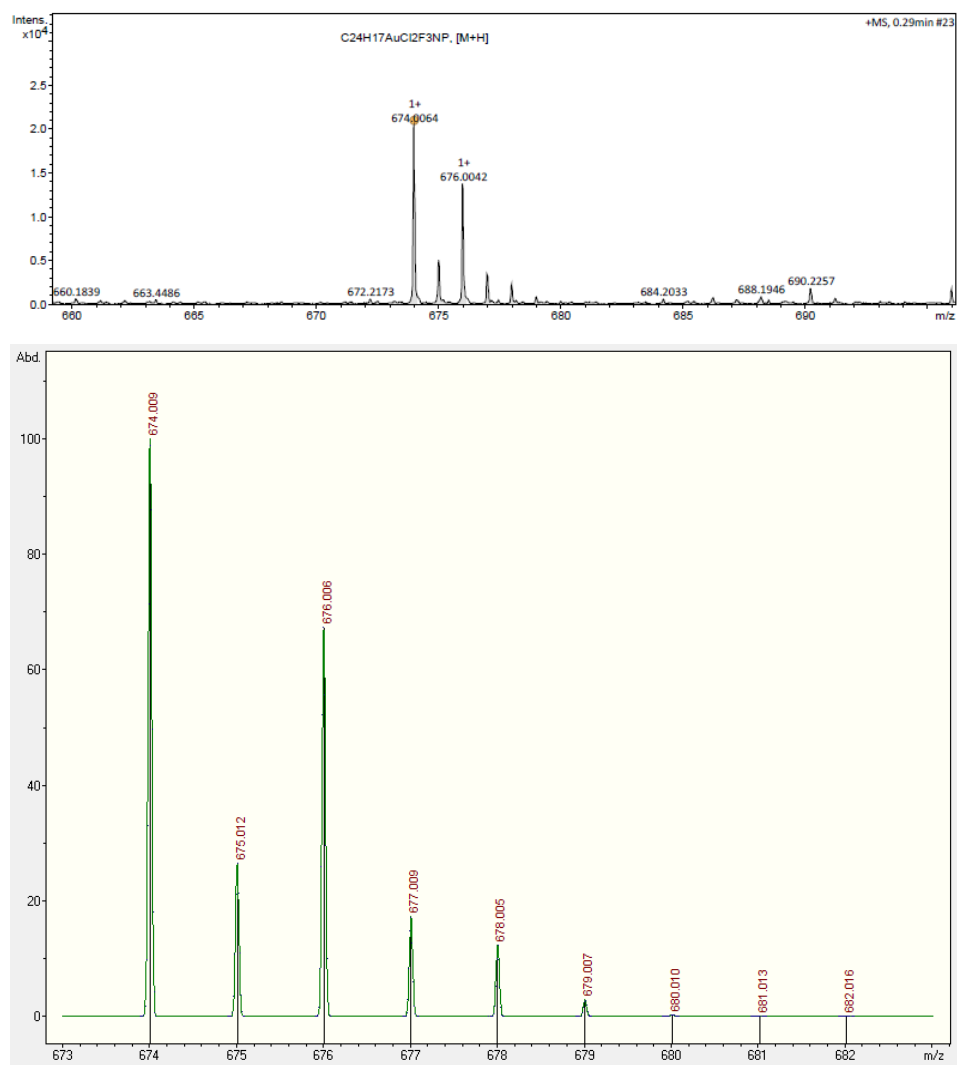

**Figure S6.** ESI Positive of  $[\text{Au}(\text{C}_6\text{Cl}_2\text{F}_3)(\text{PNH}_2)]$  (2): spectrum of experimental microTOF-Q (top) *versus* theoretical (bottom) positive mass spectrometry data

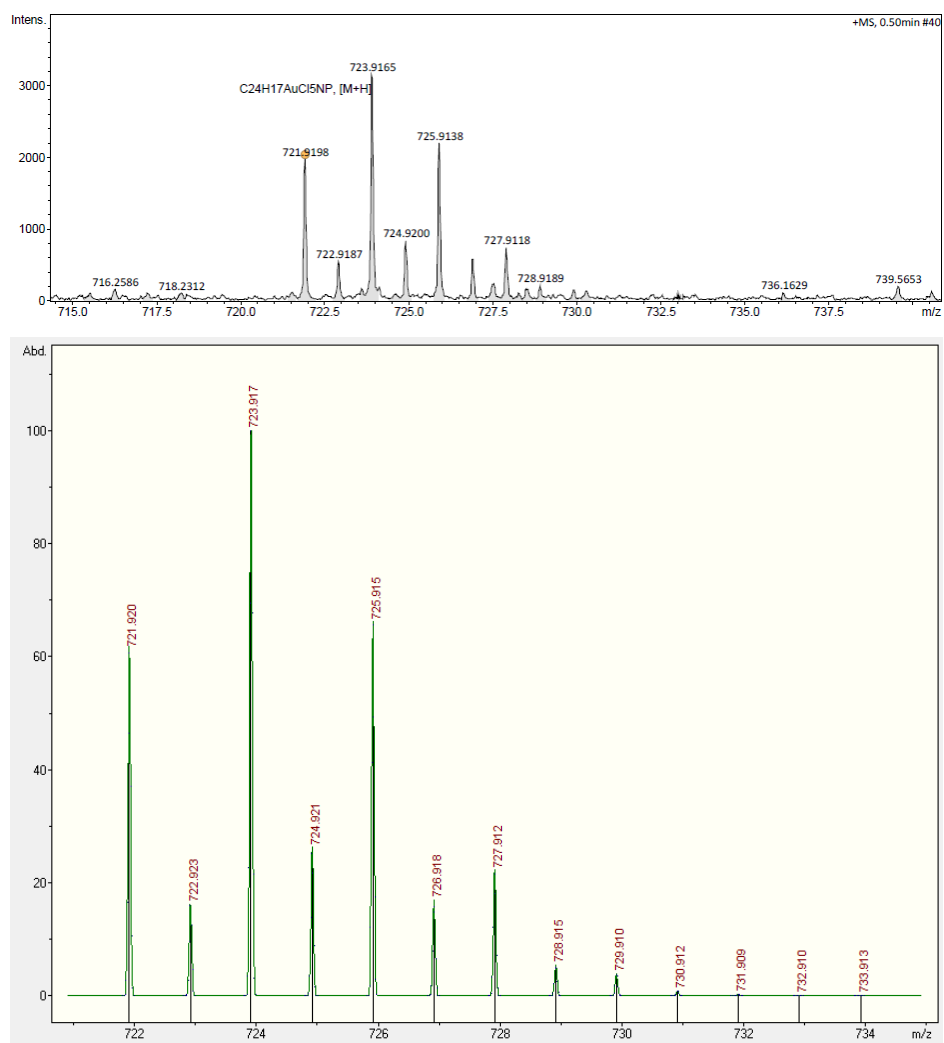

**Figure S7.** ESI Positive of  $[\text{Au}(\text{C}_6\text{Cl}_5)(\text{PNH}_2)]$  (3): spectrum of experimental microTOF-Q (top) *versus* theoretical (bottom) positive mass spectrometry data

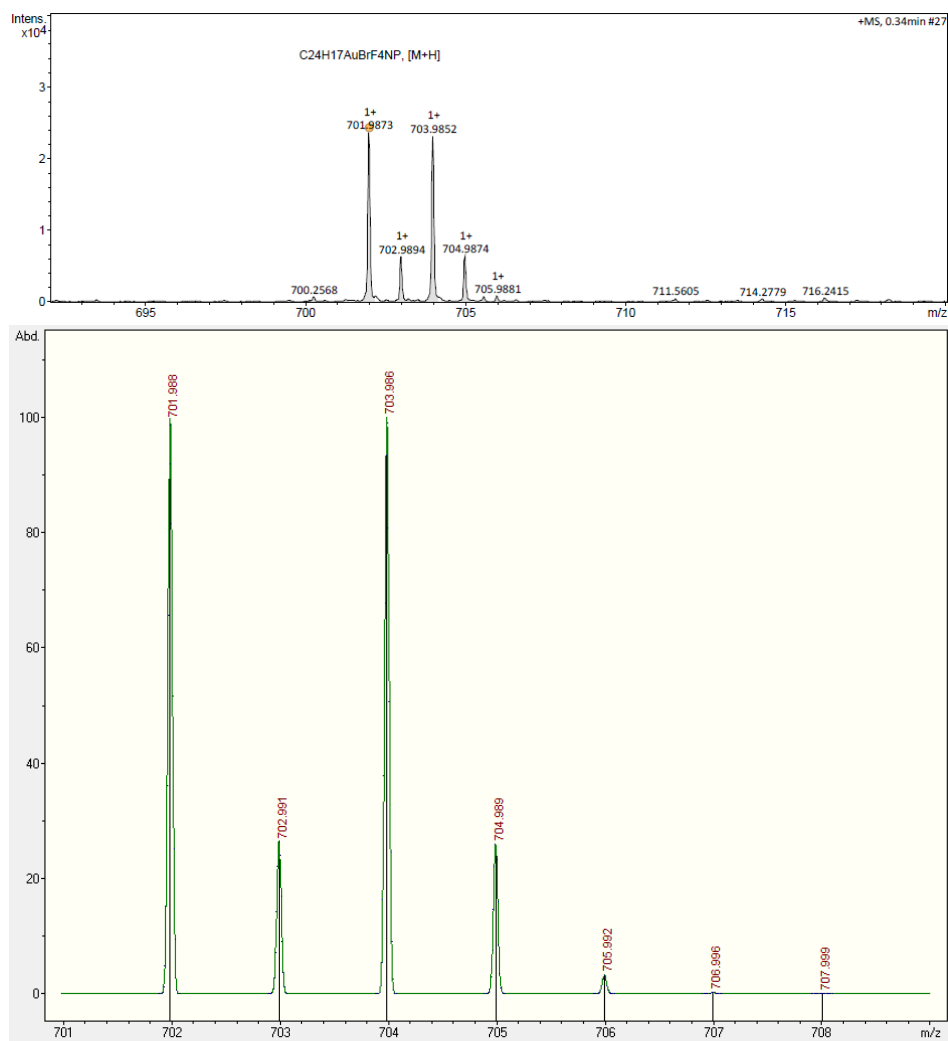

**Figure S8.** ESI Positive of  $[Au(o-C_6BrF_4)(PNH_2)]$  (4): spectrum of experimental microOTOF-Q (top) *versus* theoretical (bottom) positive mass spectrometry data

### 3. $^1\text{H}$ NMR spectra (300 MHz, 298K)

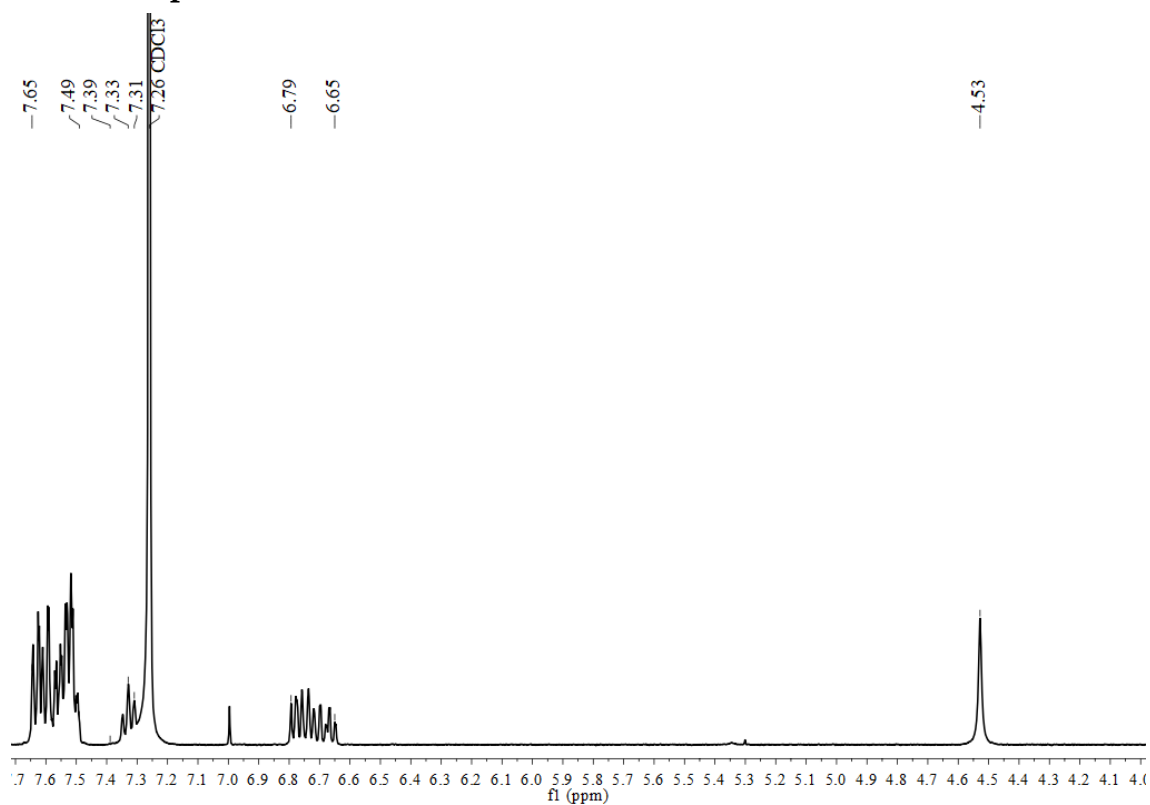

Figure S9.  $^1\text{H}$  NMR spectrum of complex  $[\text{Au}(\text{C}_6\text{F}_5)(\text{PNH}_2)]$  (**1**) in  $\text{CDCl}_3$  400

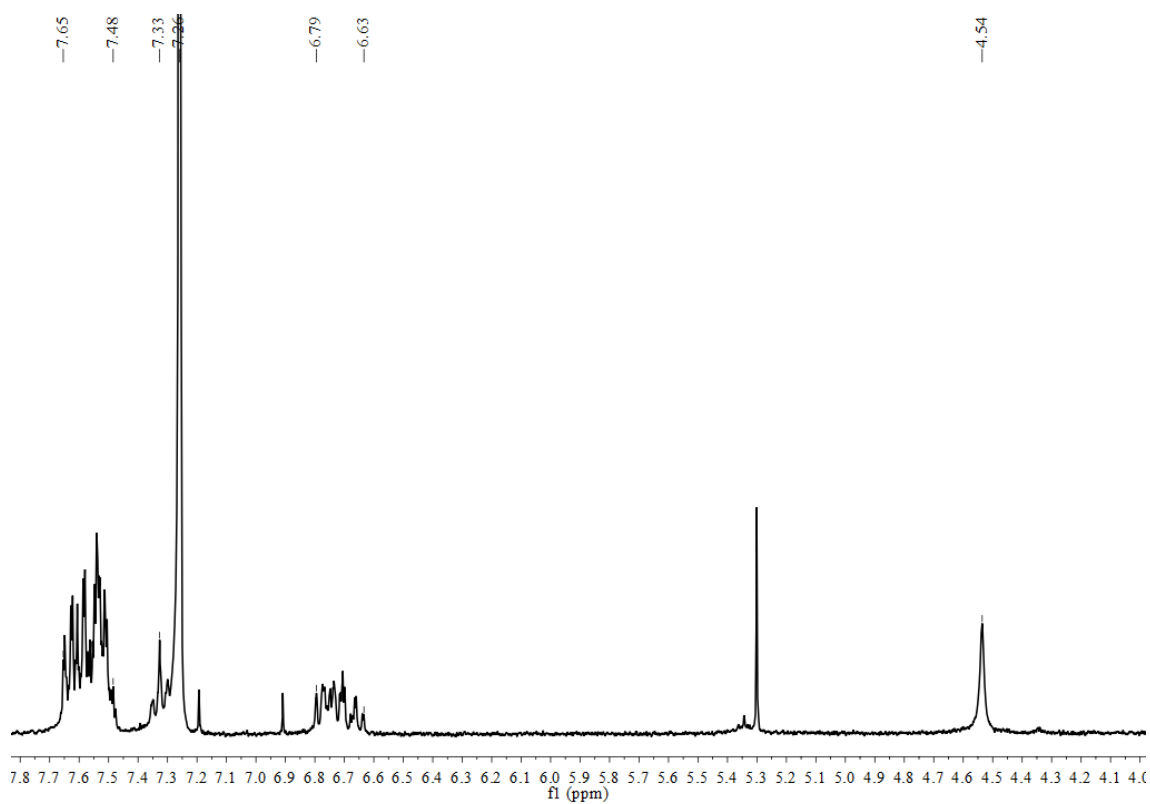

Figure S10.  $^1\text{H}$  NMR spectrum of complex  $[\text{Au}(\text{C}_6\text{Cl}_2\text{F}_3)(\text{PNH}_2)]$  (**2**) in  $\text{CDCl}_3$  400



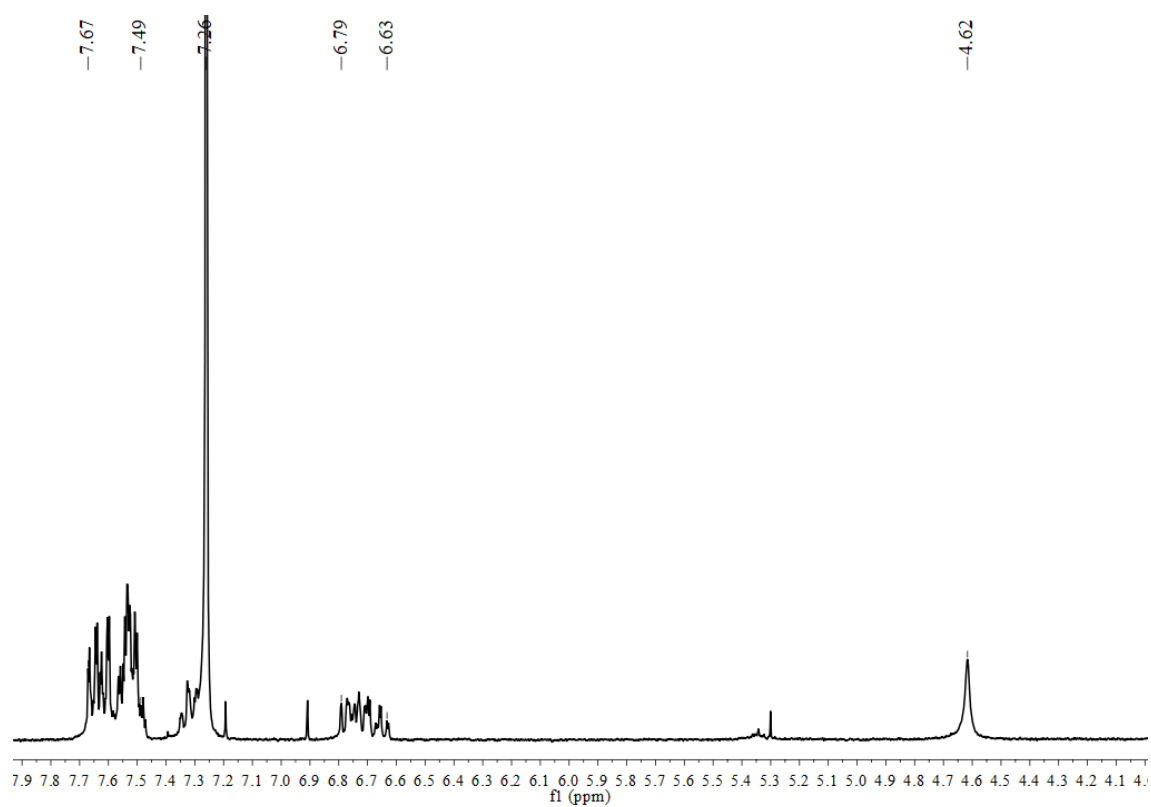

**Figure S11.** <sup>1</sup>H NMR spectrum of complex [Au(C<sub>6</sub>Cl<sub>5</sub>)(PNH<sub>2</sub>)] (3) in CDCl<sub>3</sub> 300

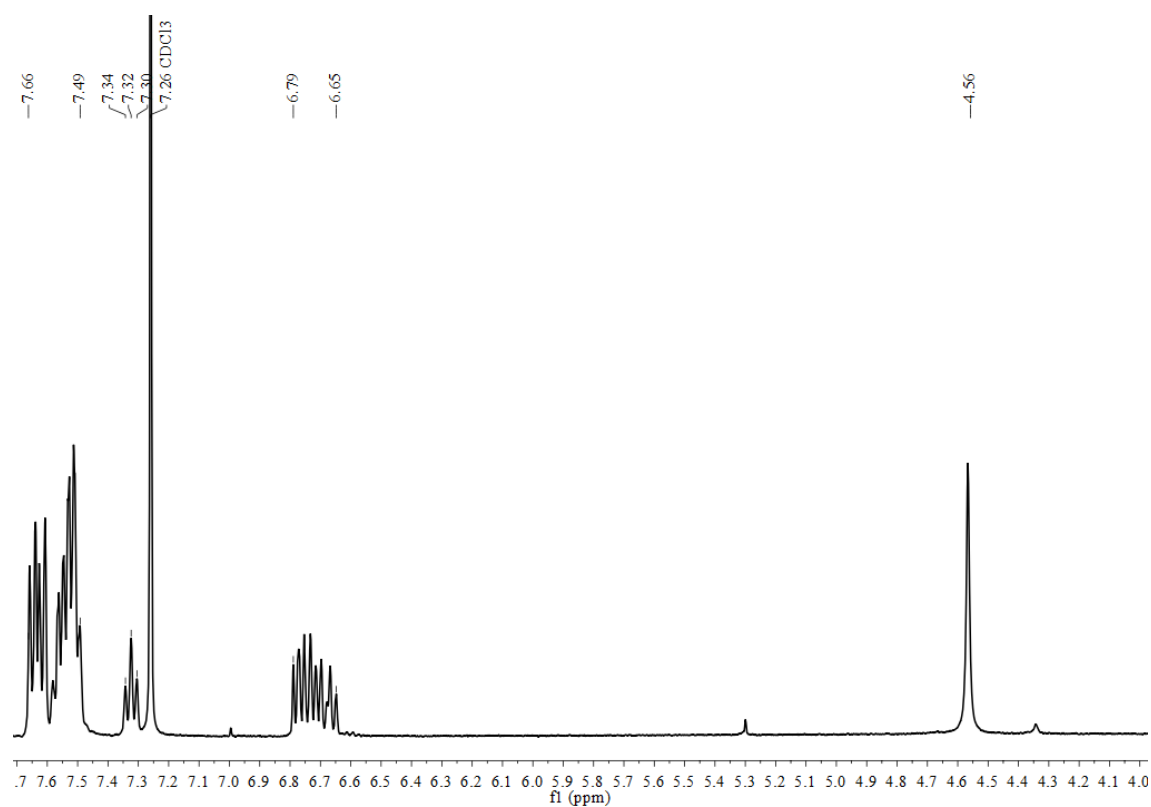

**Figure S12.** <sup>1</sup>H NMR spectrum of complex [Au(*o*-C<sub>6</sub>BrF<sub>4</sub>)(PNH<sub>2</sub>)] (4) in CDCl<sub>3</sub> 400

#### 4. $^{19}\text{F}$ NMR spectra (282 MHz, 298K)

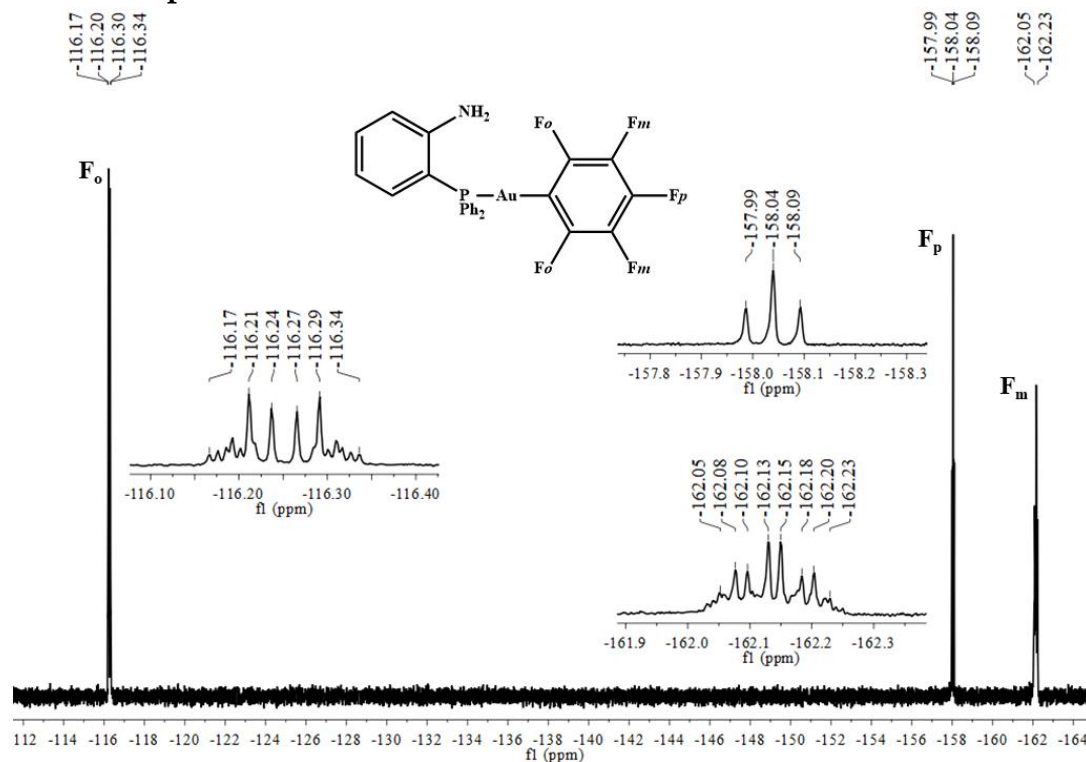

Figure S13.  $^{19}\text{F}$  NMR spectrum of complex  $\text{Au}(\text{C}_6\text{F}_5)(\text{PNH}_2)]$  (1) in  $\text{CDCl}_3$  400

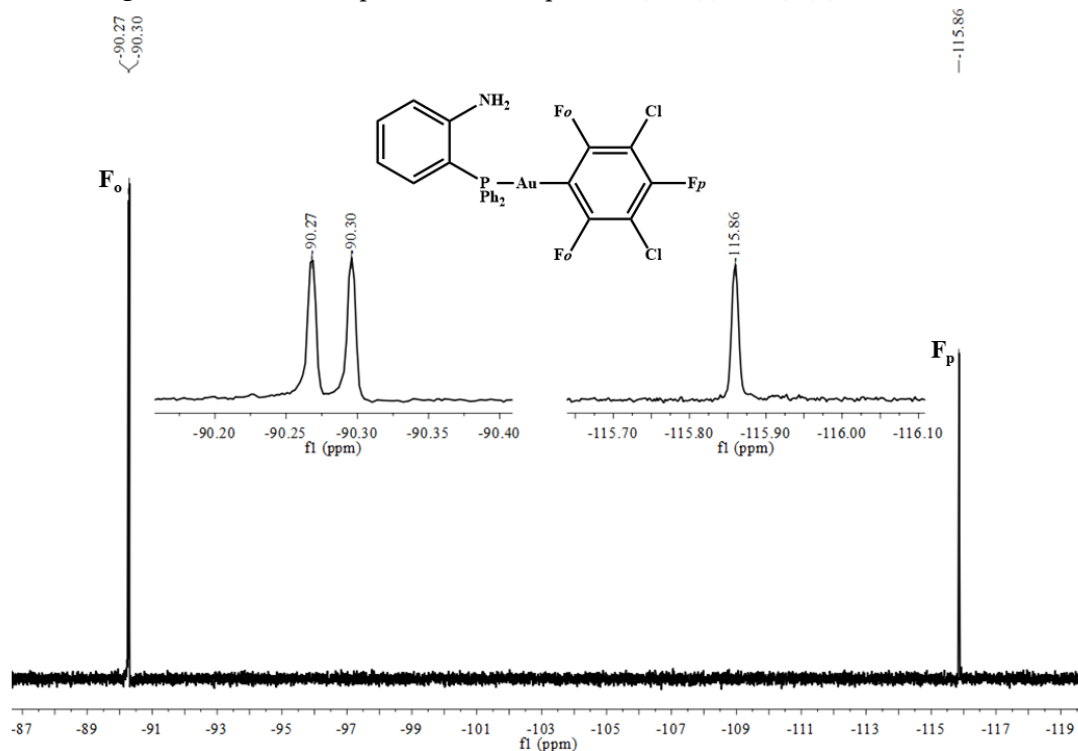

Figure S14.  $^{19}\text{F}$  NMR spectrum of complex  $[\text{Au}(\text{C}_6\text{Cl}_2\text{F}_3)(\text{PNH}_2)]$  (2) in  $\text{CDCl}_3$  300

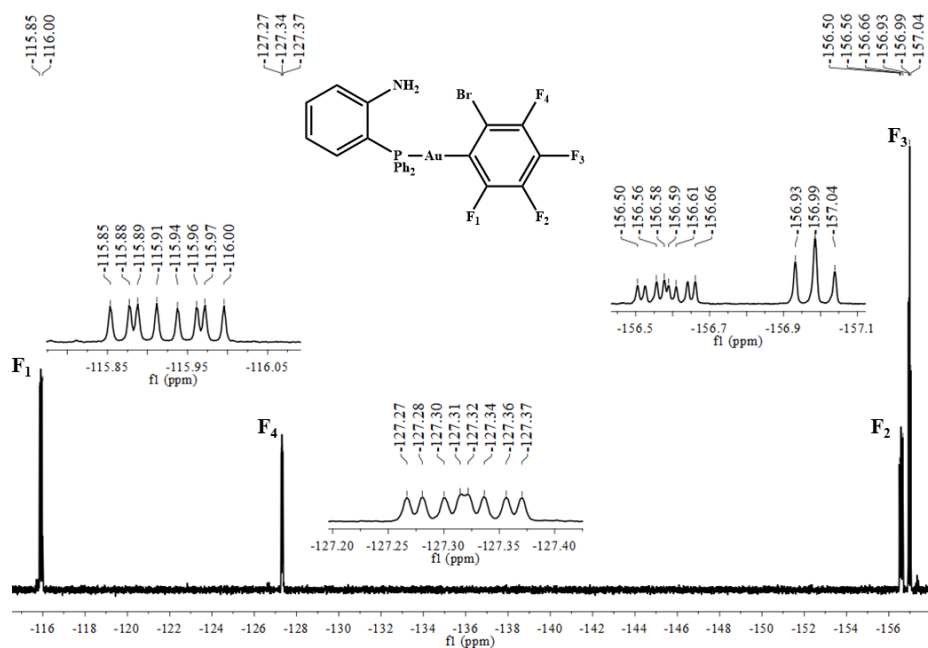

Figure S15.  $^{19}\text{F}$  NMR spectrum of complex  $[\text{Au}(\text{o-C}_6\text{BrF}_4)(\text{PNH}_2)]$  (**4**) in CDCl<sub>3</sub> 400

## 5. $^{31}\text{P}\{^1\text{H}\}$ NMR spectra (MHZ, 298K)

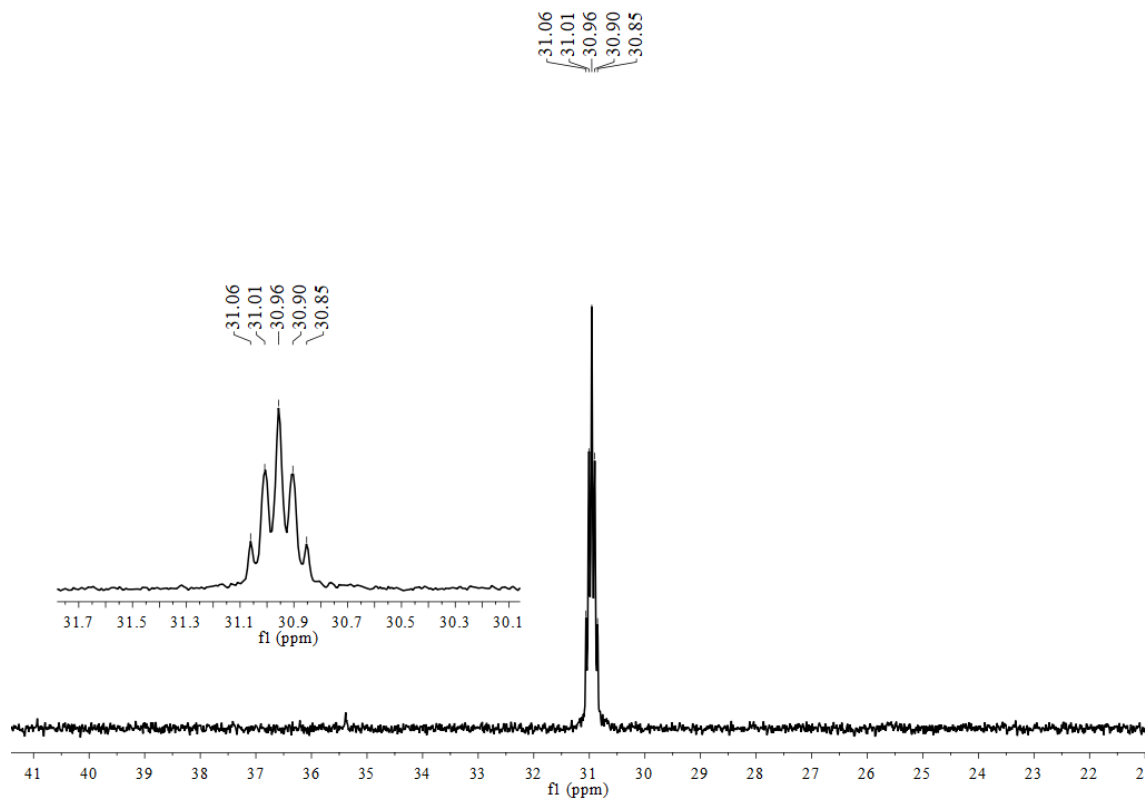

Figure S16.  $^{31}\text{P}\{^1\text{H}\}$  NMR spectrum of complex  $[\text{Au}(\text{C}_6\text{F}_5)(\text{PNH}_2)]$  (**1**) in CDCl<sub>3</sub> 400

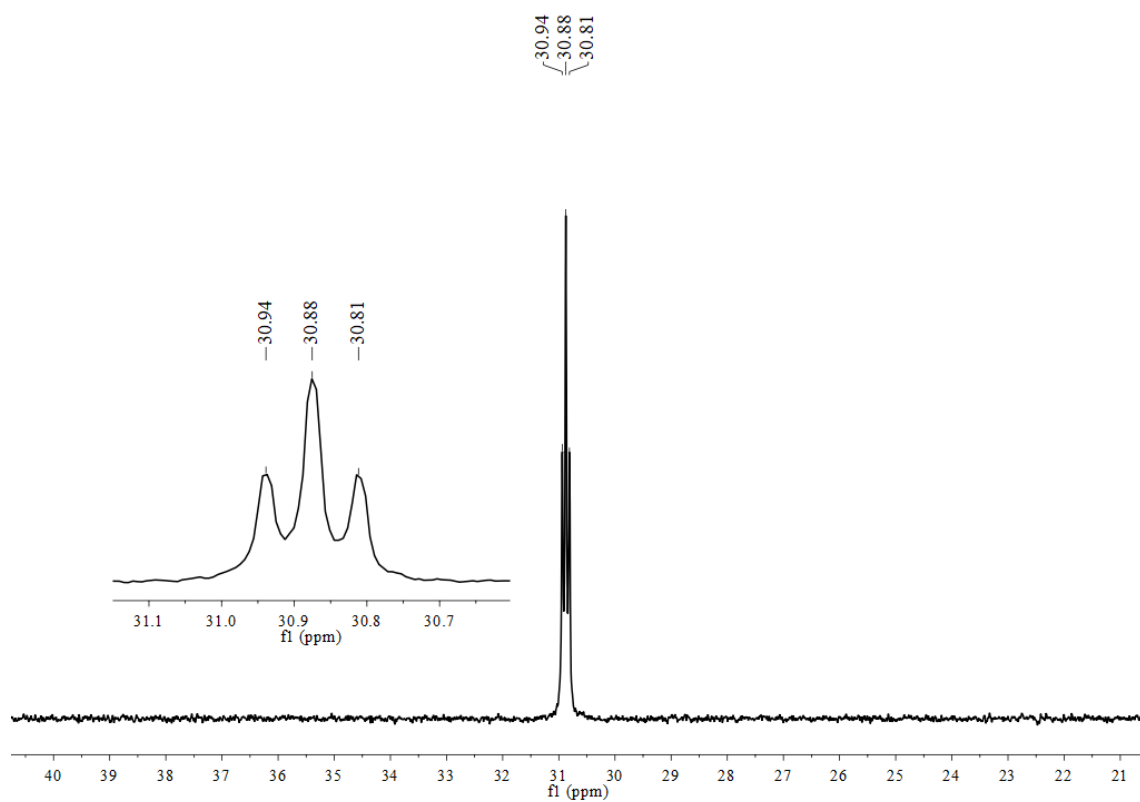

**Figure S17.**  $^{31}\text{P}\{^1\text{H}\}$  NMR spectrum of complex  $[\text{Au}(\text{C}_6\text{Cl}_2\text{F}_3)(\text{PNH}_2)]$  (2) in  $\text{CDCl}_3$  300

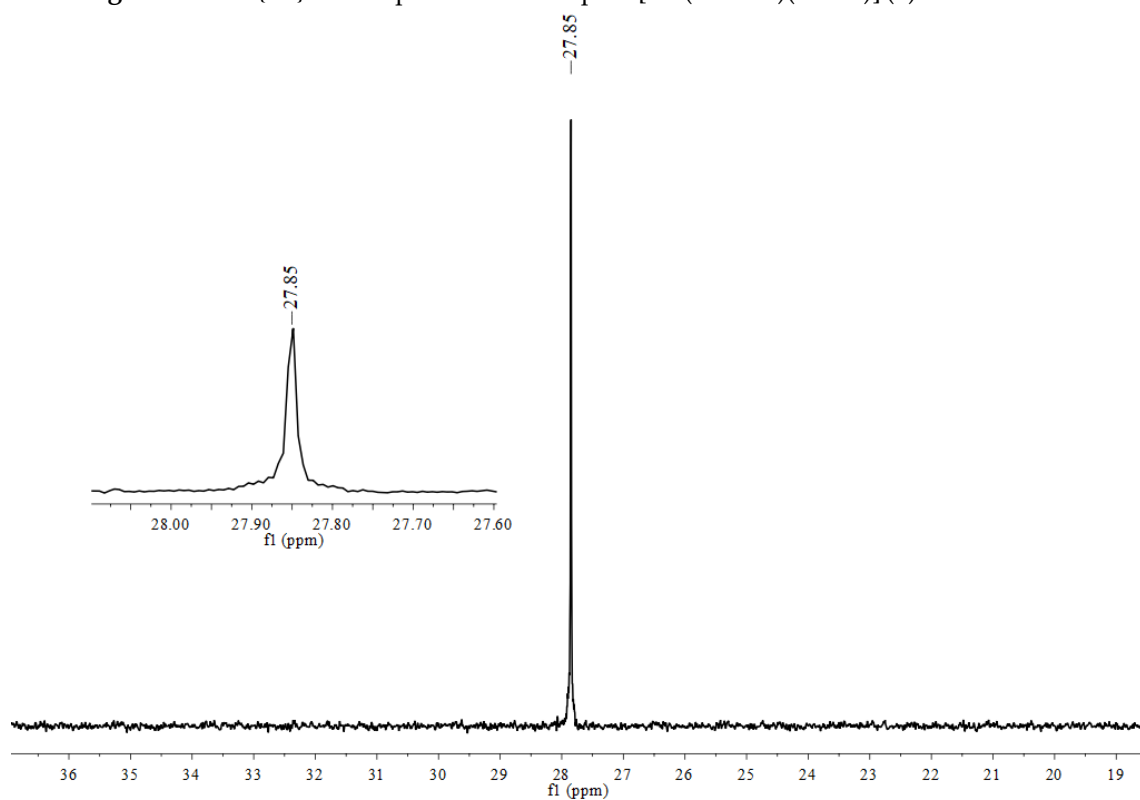

**Figure S18.**  $^{31}\text{P}\{^1\text{H}\}$  NMR spectrum of complex  $[\text{Au}(\text{C}_6\text{Cl}_5)(\text{PNH}_2)]$  (3) in  $\text{CDCl}_3$  300

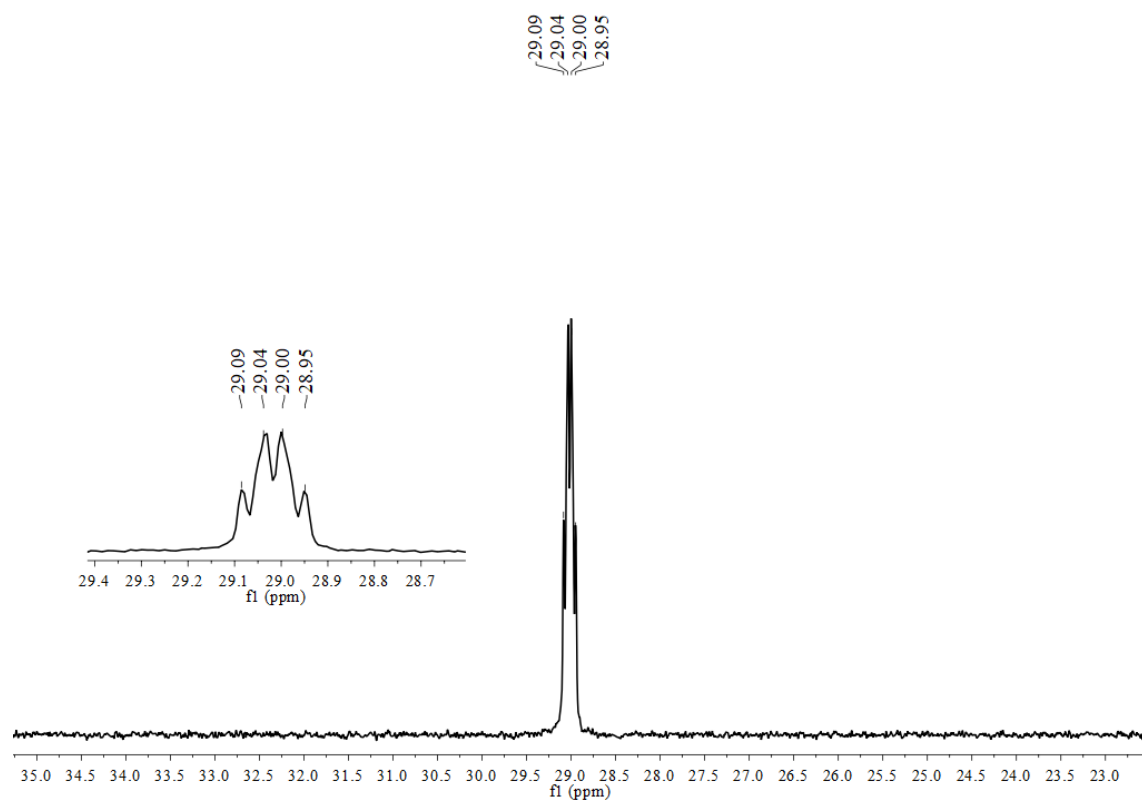

**Figure S19.**  $^{31}\text{P}\{^1\text{H}\}$  NMR spectrum of complex  $[\text{Au}(o\text{-C}_6\text{BrF}_4)(\text{PNH}_2)]$  (**4**) in  $\text{CDCl}_3$  400

## 6. Single crystals X-ray diffraction analyses

**Table S1.** Data collection and structure refinement details for **1**, **2**, **3** and **4**.

|                                                     | <b>1</b>                                            | <b>2</b>                                                            | <b>3</b>                                             | <b>4</b>                                              |
|-----------------------------------------------------|-----------------------------------------------------|---------------------------------------------------------------------|------------------------------------------------------|-------------------------------------------------------|
| Chemical Formula                                    | C <sub>24</sub> H <sub>16</sub> AuF <sub>5</sub> NP | C <sub>24</sub> H <sub>16</sub> AuCl <sub>2</sub> F <sub>3</sub> NP | C <sub>24</sub> H <sub>16</sub> AuCl <sub>5</sub> NP | C <sub>24</sub> H <sub>16</sub> AuBrF <sub>4</sub> NP |
| Crystal habit                                       | colorless                                           | colorless                                                           | colorless                                            | colorless                                             |
| Crystal size/mm                                     | 0.060 × 0.026 × 0.014                               | 0.143 × 0.121 × 0.049                                               | 0.162 × 0.059 × 0.020                                | 0.283 × 0.096 × 0.084                                 |
| Crystal system                                      | Monoclinic                                          | Monoclinic                                                          | Triclinic                                            | Monoclinic                                            |
| Space group                                         | P2 <sub>1</sub> /c                                  | P2 <sub>1</sub> /n                                                  | P-1                                                  | P2 <sub>1</sub> /n                                    |
| a/Å                                                 | 7.9453(7)                                           | 8.2765(5)                                                           | 10.1789(11)                                          | 8.1842(11)                                            |
| b/Å                                                 | 12.0802(10)                                         | 11.9307(7)                                                          | 10.6136(12)                                          | 12.0374(15)                                           |
| c/Å                                                 | 22.847(2)                                           | 22.5683(15)                                                         | 11.2905(12)                                          | 23.570(3)                                             |
| α/°                                                 | 90                                                  | 90                                                                  | 101.120(4)                                           | 90                                                    |
| β/°                                                 | 98.012(3)                                           | 100.476(2)                                                          | 93.797(4)                                            | 99.558(5)                                             |
| γ/°                                                 | 90                                                  | 90                                                                  | 93.764(4)                                            | 90                                                    |
| V/Å <sup>3</sup>                                    | 2171.5(3)                                           | 2191.3(2)                                                           | 1190.4(2)                                            | 2289.8(5)                                             |
| Z                                                   | 4                                                   | 4                                                                   | 2                                                    | 4                                                     |
| Dc/g cm <sup>-3</sup>                               | 1.962                                               | 2.044                                                               | 2.019                                                | 2.037                                                 |
| M                                                   | 641.31                                              | 674.21                                                              | 723.56                                               | 702.22                                                |
| F(000)                                              | 1224.0                                              | 1288.0                                                              | 692.0                                                | 1328.0                                                |
| T/K                                                 | 118(2)                                              | 100(2)                                                              | 100(2)                                               | 300(2)                                                |
| 2θmax/°                                             | 55.930                                              | 55.788                                                              | 55.82                                                | 51.362                                                |
| μ(Mo-Kα)/mm <sup>-1</sup>                           | 6.903                                               | 7.069                                                               | 6.822                                                | 8.284                                                 |
| No. refl. Measured                                  | 41168                                               | 60441                                                               | 29401                                                | 111607                                                |
| No. unique refl.                                    | 5200                                                | 5214                                                                | 5660                                                 | 4329                                                  |
| Rint                                                | 0.0679                                              | 0.0357                                                              | 0.0313                                               | 0.0437                                                |
| R[F>2σ(F)][a]                                       | 0.0678                                              | 0.0352                                                              | 0.0278                                               | 0.0726                                                |
| wR[F <sub>2</sub> , all refl.][b]                   | 0.1443                                              | 0.0865                                                              | 0.0620                                               | 0.1549                                                |
| No. of refl. Used<br>[F>2σ(F)]                      | 5200                                                | 5214                                                                | 5660                                                 | 4329                                                  |
| No. of parameters                                   | 286                                                 | 289                                                                 | 298                                                  | 286                                                   |
| No. of restraints                                   | 0                                                   | 0                                                                   | 0                                                    | 0                                                     |
| S [c]                                               | 1.216                                               | 1.156                                                               | 1.172                                                | 1.342                                                 |
| Max. residual electron<br>density/e·Å <sup>-3</sup> | 1.30                                                | 1.67                                                                | 1.39                                                 | 2.223                                                 |

<sup>a</sup>  $R: (F) = \sum ||F_o| - |F_c|| / \sum |F_o|$ .

<sup>b</sup>  $wR: (F^2) = [\sum \{w(F_o^2 - F_c^2)^2\} / \sum \{w(F_o^2)^2\}]^{0.5}$ ;  $w^{-1} = \sigma^2(F_o^2) + (aP)^2 + bP$ , where  $P = [F_o^2 + 2F_c^2]/3$  and  $a$  and  $b$  are constants adjusted by the program.

<sup>c</sup>  $S = [\sum \{w(F_o^2 - F_c^2)^2\} / (n-p)]^{0.5}$ , where  $n$  is the number of data and  $p$  the number of parameters.

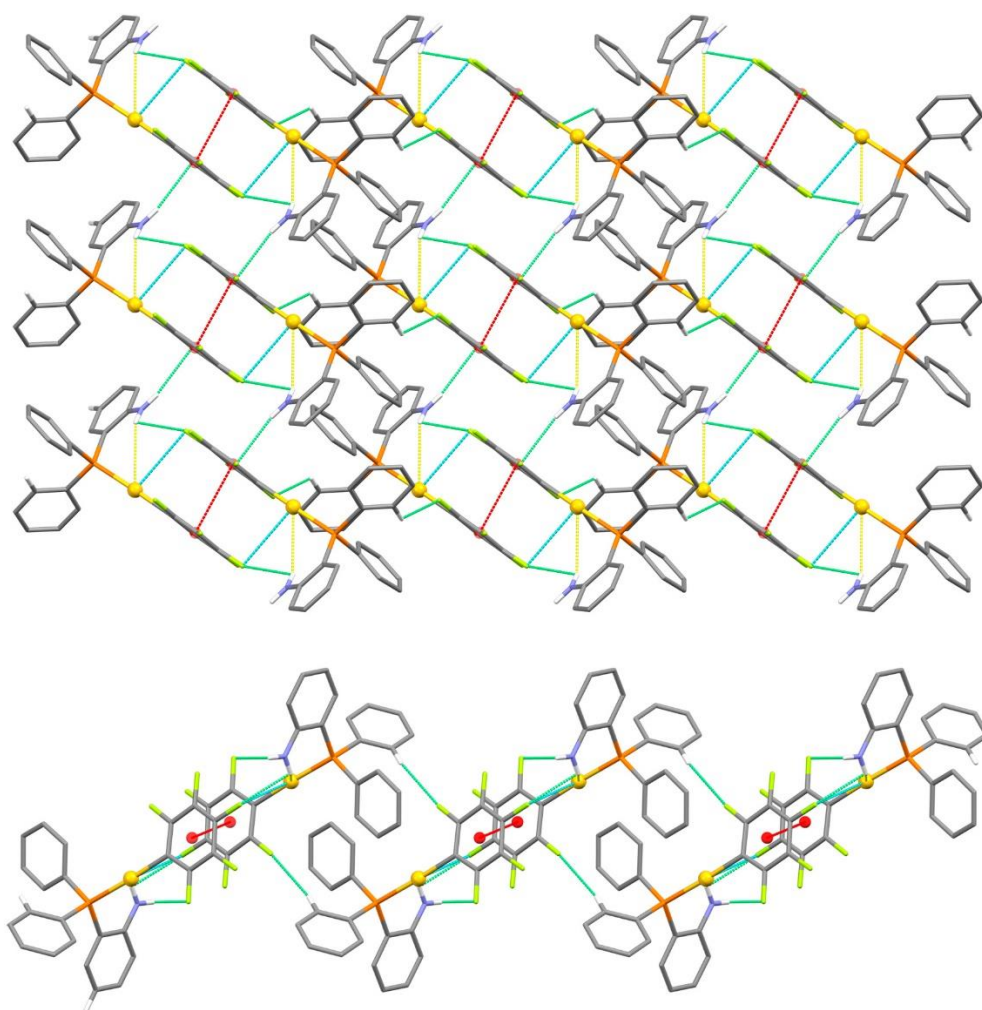

**Figure S20.** Two different views of the supramolecular arrangement in the crystal structure of **1**, depicting the intramolecular N-H $\cdots$ Au hydrogen bonds (in yellow), the Au $\cdots$ F (in blue) and  $\pi$ - $\pi$  stacking interactions between C<sub>6</sub>F<sub>5</sub> rings (in red) within the dimers, and intermolecular N-H $\cdots$ F and C-H $\cdots$ F hydrogen bonds (in green) that give rise to the 3D network. Hydrogen atoms not involved in weak contacts have been omitted for clarity. Color code: yellow: gold; orange: phosphorus; blue: nitrogen; grey: carbon; white: hydrogen; light green: fluorine.

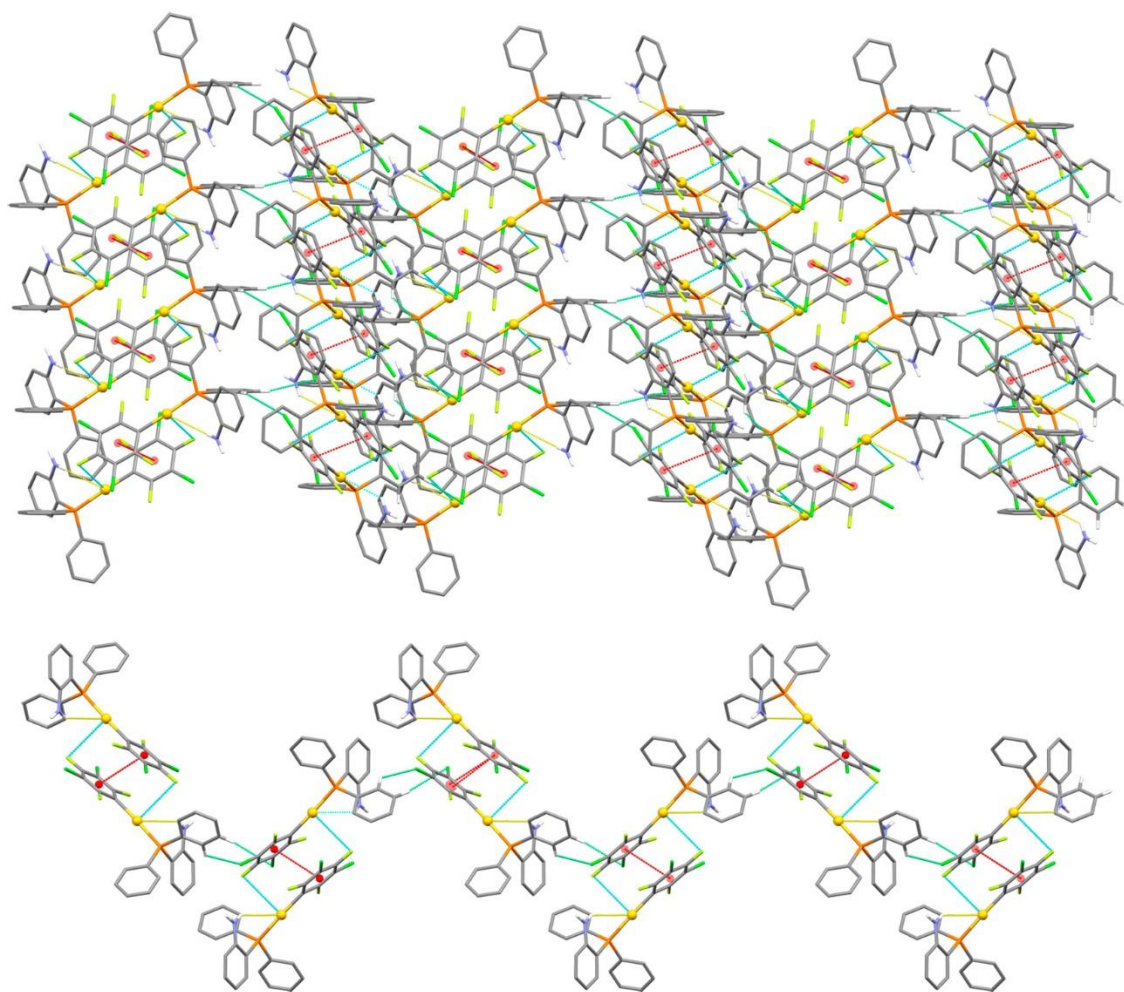

**Figure S21.** Two different views of the supramolecular arrangement in the crystal structure of **2**, depicting the intramolecular N-H $\cdots$ Au hydrogen bonds (in yellow), the Au $\cdots$ F (in blue) and  $\pi$ - $\pi$  stacking interactions between C<sub>6</sub>Cl<sub>2</sub>F<sub>3</sub> rings (in red) within the dimers, and intermolecular C-H $\cdots$ Cl and C-H $\cdots$ F hydrogen bonds (in green) that give rise to the 3D network. Hydrogen atoms not involved in weak contacts have been omitted for clarity. Color code: yellow: gold; orange: phosphorus; blue: nitrogen; grey: carbon; white: hydrogen; green: chlorine; light green: fluorine.



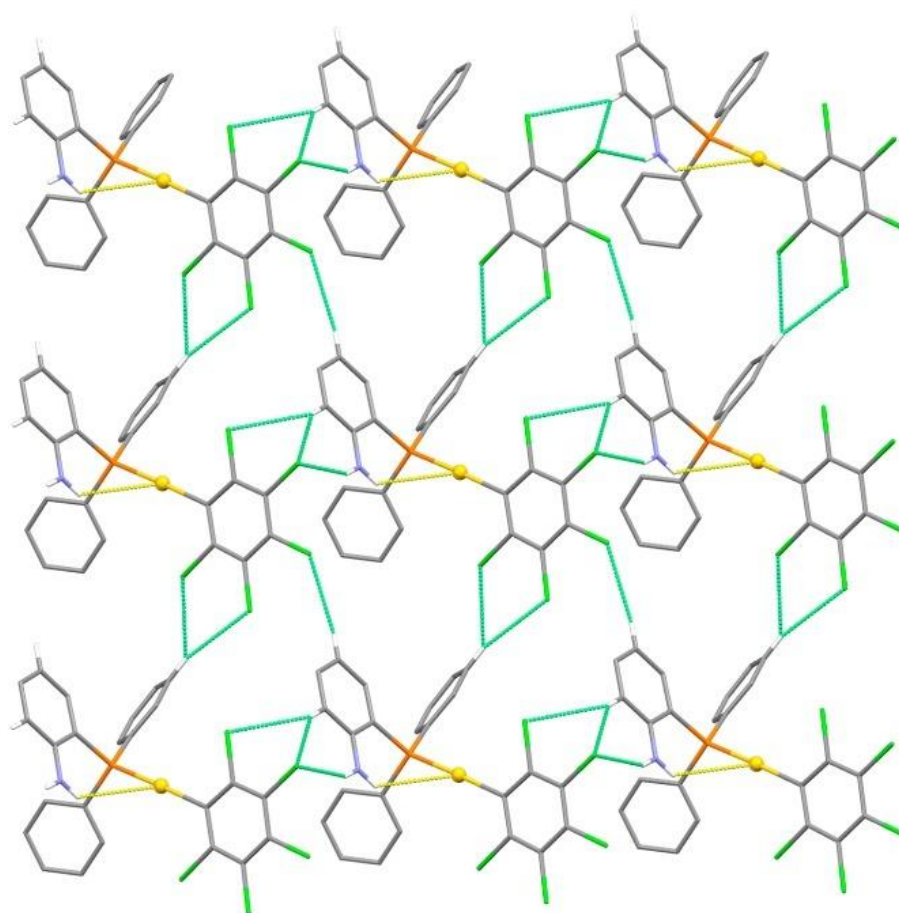

**Figure S22.** Supramolecular arrangement in the crystal structure of **3** viewed from the crystallographic  $y$  axis, depicting the N-H $\cdots$ Cl and C-H $\cdots$ Cl hydrogen bonds (in green) that give rise to the 2D network, and the intramolecular N-H $\cdots$ Au hydrogen bonds (in yellow). Hydrogen atoms not involved in weak contacts have been omitted for clarity. Color code: yellow: gold; orange: phosphorus; blue: nitrogen; grey: carbon; white: hydrogen; green: chlorine.

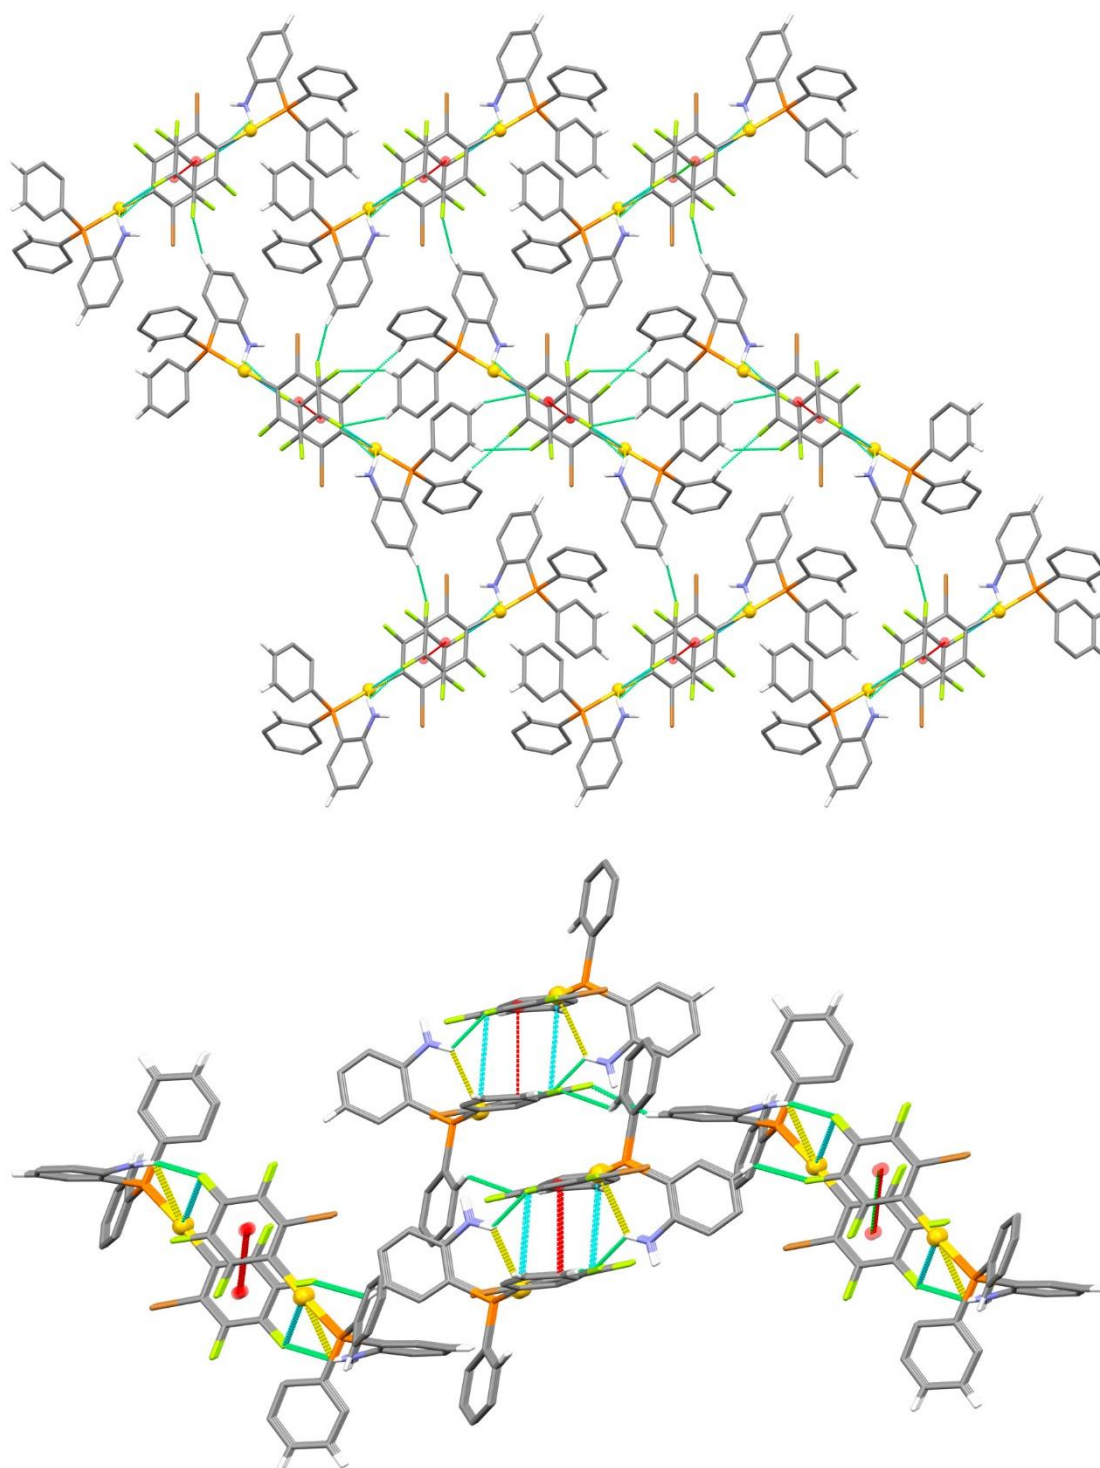

**Figure S23.** Two different views of the supramolecular arrangement in the crystal structure of **4**, depicting the C-H...F hydrogen bonds (in green) that give rise to the 3D network depicting the intramolecular N-H...Au hydrogen bonds (in yellow), the Au...F (in blue) and  $\pi$ - $\pi$  stacking interactions between C<sub>6</sub>BrF<sub>4</sub> rings (in red) within the dimers, and intermolecular C-H...F hydrogen bonds (in green) that give rise to the 3D network. Hydrogen atoms not involved in weak contacts have been omitted for clarity. Color code: yellow: gold; orange: phosphorus; blue: nitrogen; grey: carbon; white: hydrogen; brown: bromine; light green: fluorine.

## II. Computational Studies

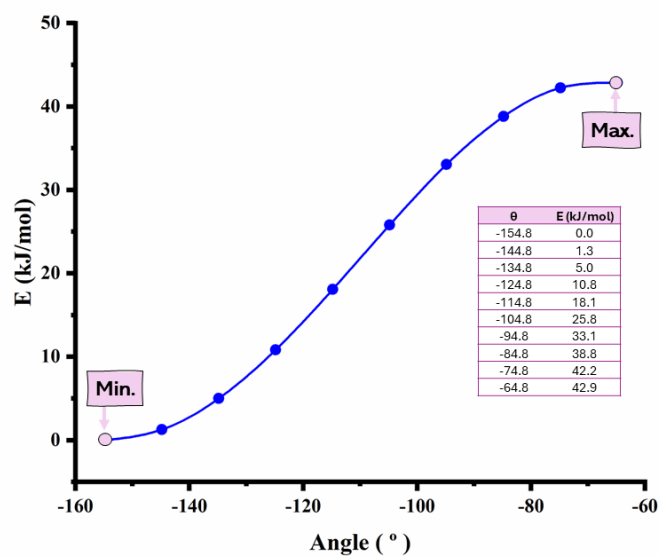

**Figure S24.** Potential energy profile for complex 1. The plot depicts the variation in relative energy as a function of the H-N-C-C dihedral angle, calculated at 10° intervals.

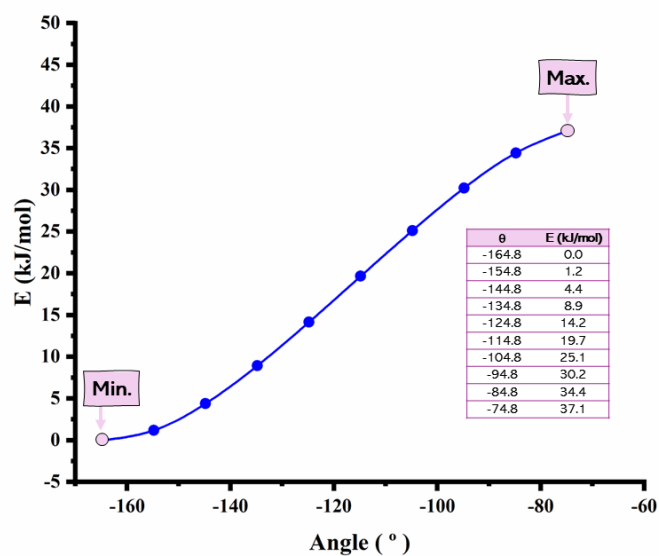

**Figure S25.** Potential energy profile for complex 2. The plot depicts the variation in relative energy as a function of the H-N-C-C dihedral angle, calculated at 10° intervals.

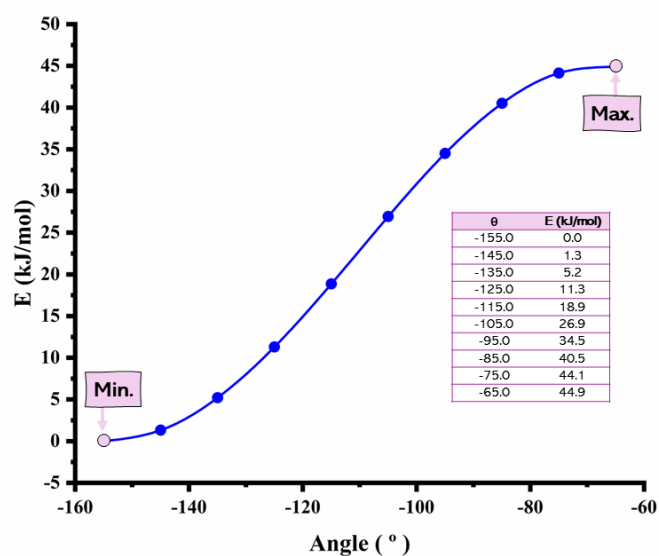

**Figure S26.** Potential energy profile for complex 3. The plot depicts the variation in relative energy as a function of the H-N-C-C dihedral angle, calculated at 10° intervals.

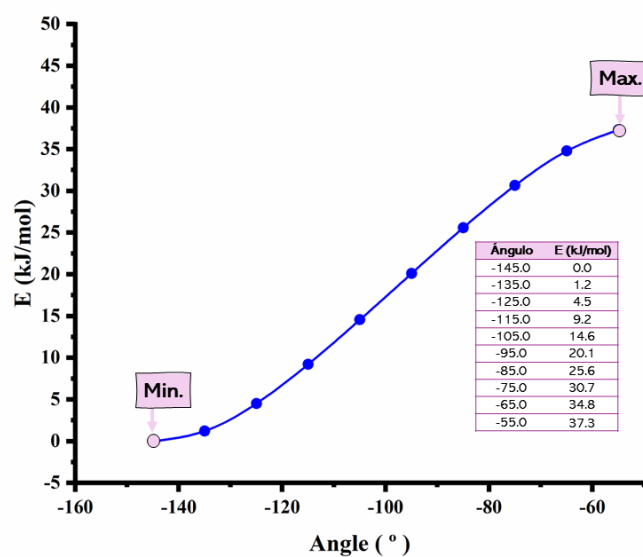

**Figure S27.** Potential energy profile for complex 4. The plot depicts the variation in relative energy as a function of the H-N-C-C dihedral angle, calculated at 10° intervals.

**Table S2.** Tables of results obtained after conducting frequency calculations for the four molecules (1-4) and their three corresponding models labelled as **a**, **b**, and **c**.

|            | Sum of electronic and thermal Free Energies (kJ/mol) |      |      |
|------------|------------------------------------------------------|------|------|
| Comformer  | a                                                    | b    | c    |
| Compound 1 | 0                                                    | 52.6 | 10.0 |
| Compound 2 | 0                                                    | 48.3 | 9.6  |
| Compound 3 | 0                                                    | 54.4 | 10.7 |
| Compound 4 | 0                                                    | 47.7 | 14.6 |
